# Supplementary material for: Compartmentalization of Immune Response and Microbial Translocation in Decompensated Cirrhosis
Source: PubMed Central journal article supplement (PMC6376951; doi:10.3389/fimmu.2019.00069), 2019-02-08
Supplement: Image_1.pdf [file Image_1.pdf]

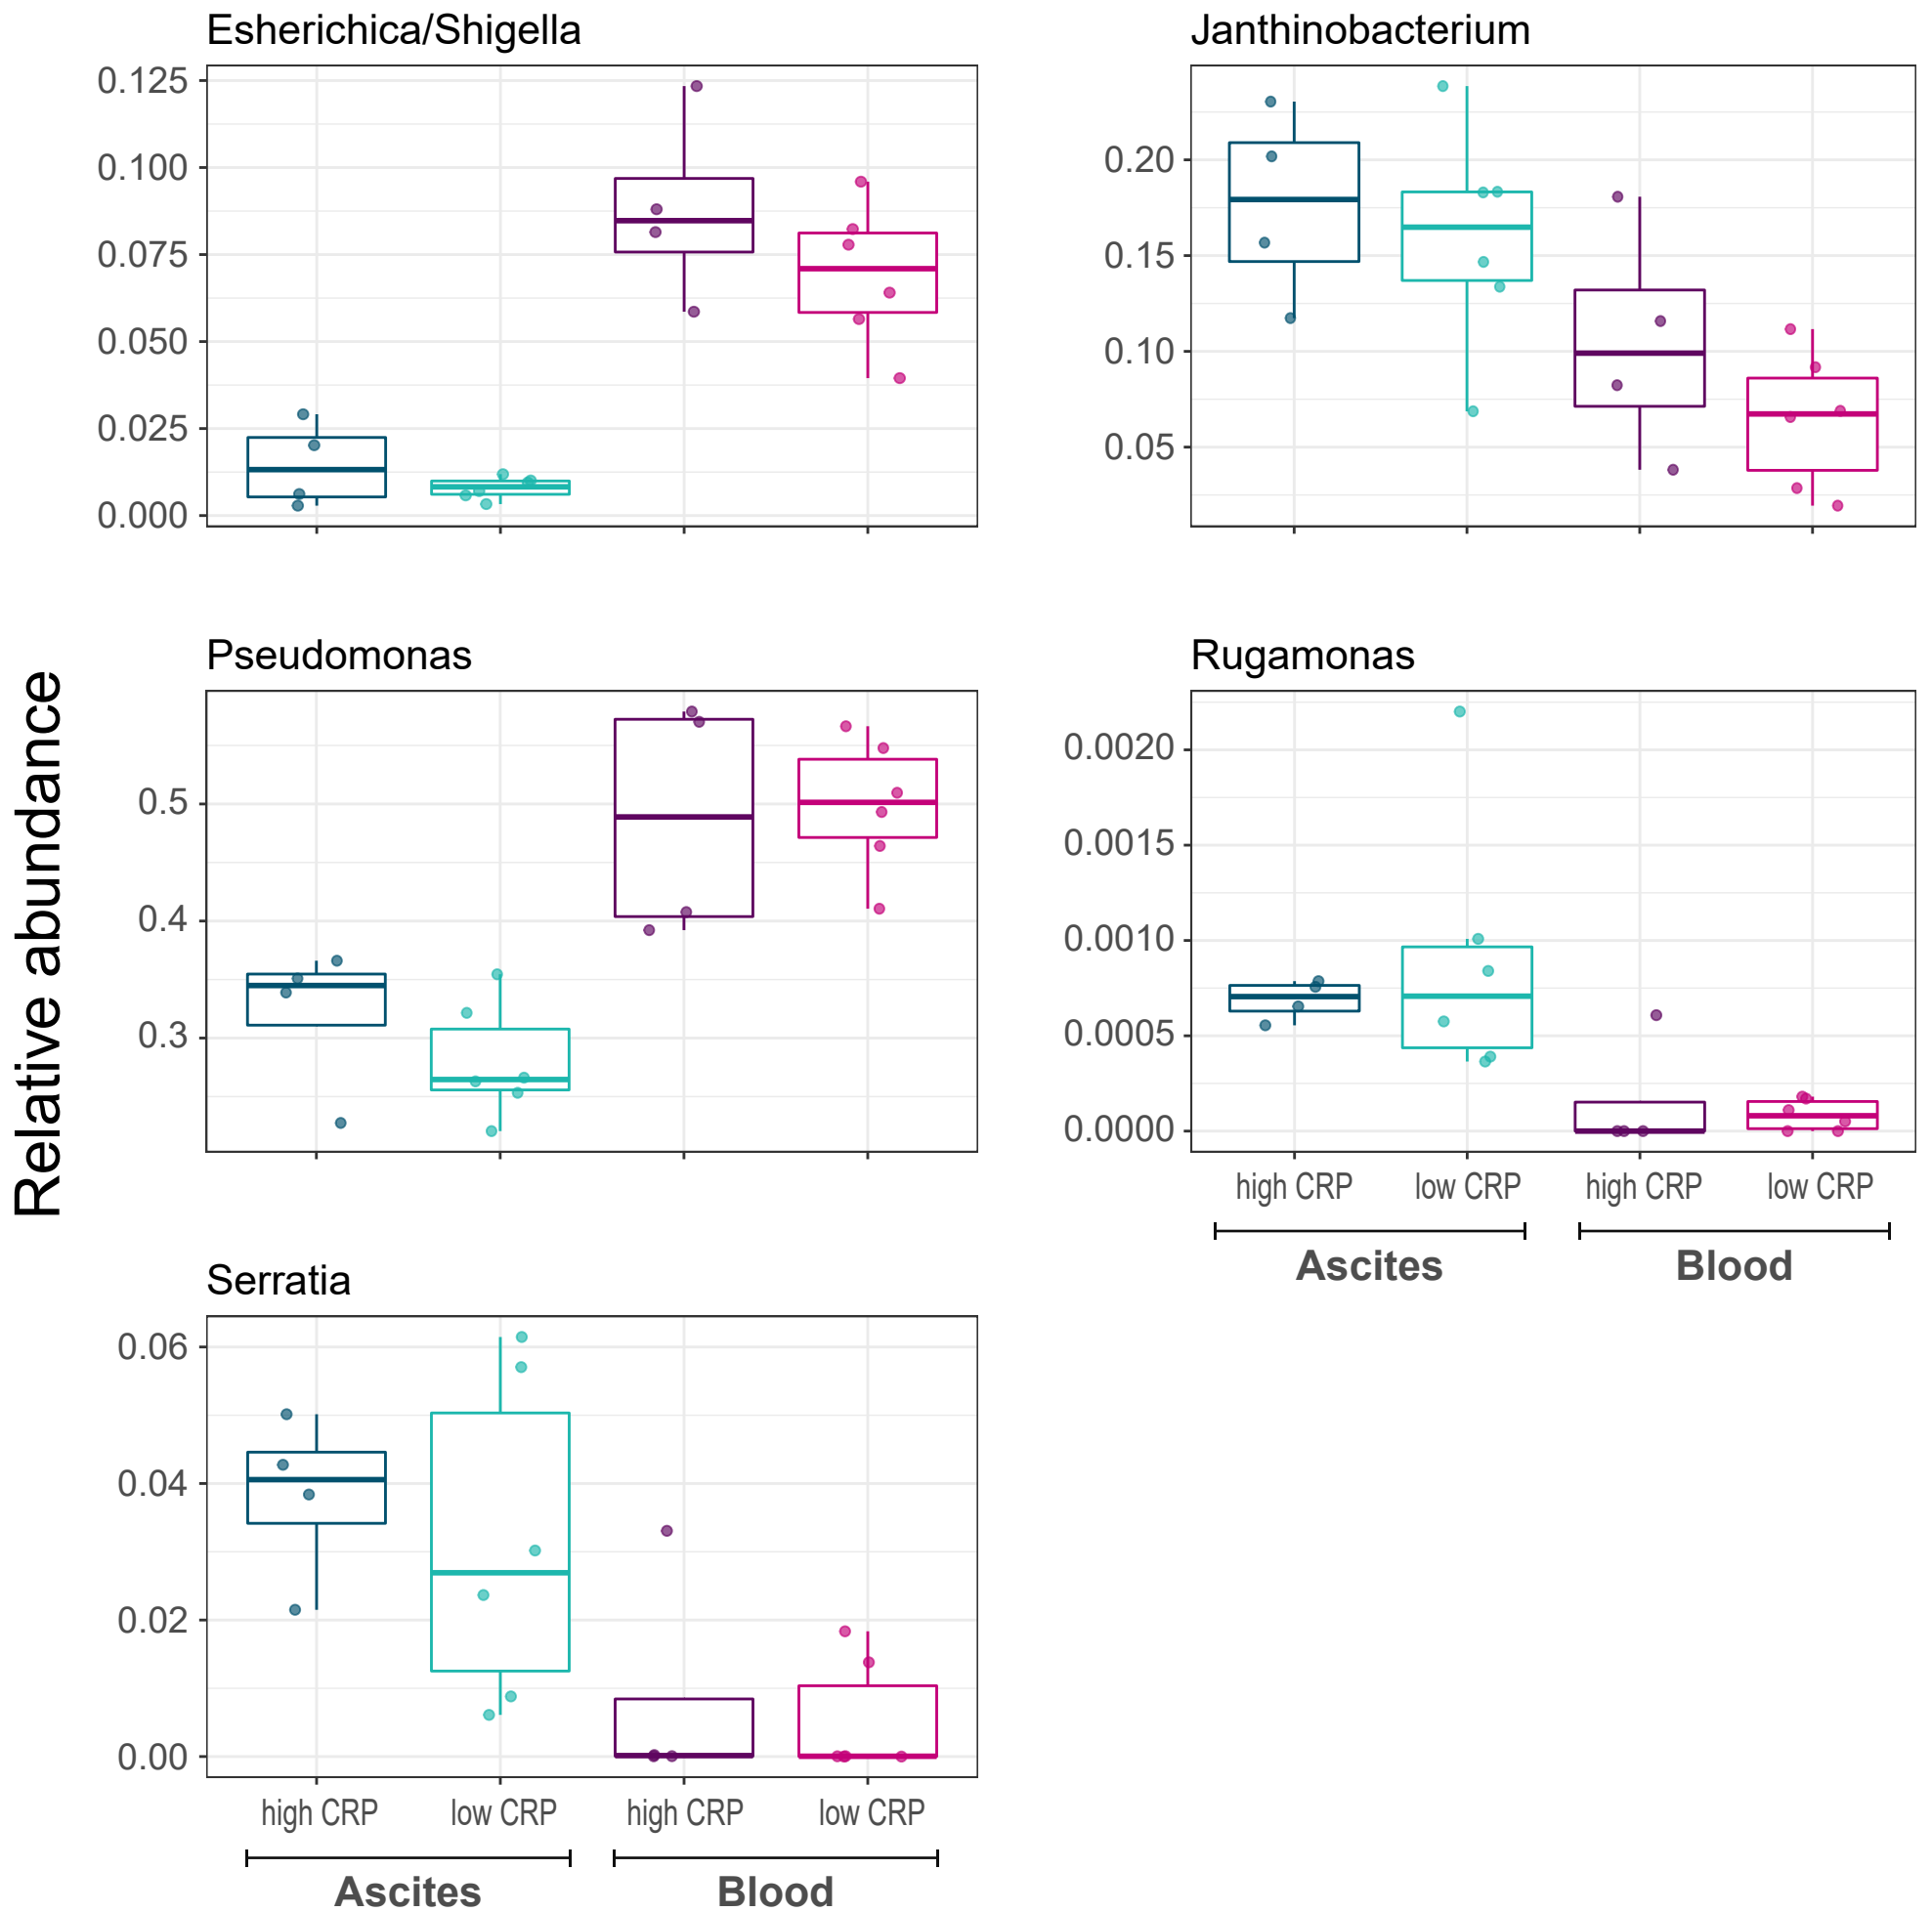

**Figure S1.** Genera differentially abundant between patients with high CRP and low CRP. Comparisons were made separately for ascites and blood samples.
